# Supplementary material for: Synthesis and Characterization of a Full-Length Infectious cDNA Clone of Tomato Mottle Mosaic Virus
Source: Viruses. 2021 Jun 1;13(6):1050. doi: 10.3390/v13061050 (PMC8229035; doi:10.3390/v13061050)
Supplement: Supplementary file 1 [file viruses-13-01050-s001.zip › Supplementary Table 1.xlsx]

## Sheet: Sheet1
Table S1.Primers used in the study.
Primer name	Sequence (from 5' to 3')	Purpose	Products size (bp)
ToMMV-1F	GTATTTATTATTACAACAATTACCAAC	PCR amplification for the full-length genome fragment 1	2286
ToMMV-1R	TTCAAGGTCAATAGCAGCAGT
ToMMV-2F	GGAGTTCTGGACGTTACCTC	PCR amplification for the full-length genome fragment 2	2310
ToMMV-2F	CACGCGGCTATAATAACAGTAT
ToMMV-3F	GGCAGAAGTGTGGAAACAAGGGCAC	PCR amplification for the full-length genome fragment 3	2079
ToMMV-3R	TGGGCCCCTACCGGGGGTTCC
ToMMV-ssF	GAGATGCCATGCCGACCCGGGTGGGCCCCTACCGGGGGT	PCR amplification for the full-length genome ToMMV-LN	6399
ToMMV-ssR	TCATTTCATTTGGAGAGGCCTGTATTTATTATTACAACAATTACCAACAACAA
ToMMCP-F	ATGTCTTACGCTATTACTTCTCCG	RT-PCR detection for ToMMV genome RNA	480
ToMMCP-R	TTAGGACGCTGGCGCAGAAG
ToMMCP-T7	TAATACGACTCACTATAGGATGTCTTACGCTATTACTTCTC	Synthesis of sense ToMMV CP probe for Northern blot anylysis	480
ToMMCP-BR	GGATCCTTAGGACGCTGGCGCAGAAGTC
